# Supplementary material
Source: PubMed Central journal article supplement (PMC9514290)
Supplement: NIHMS1826567-supplement-Suppl_Figures.pdf [file NIHMS1826567-supplement-Suppl_Figures.pdf]

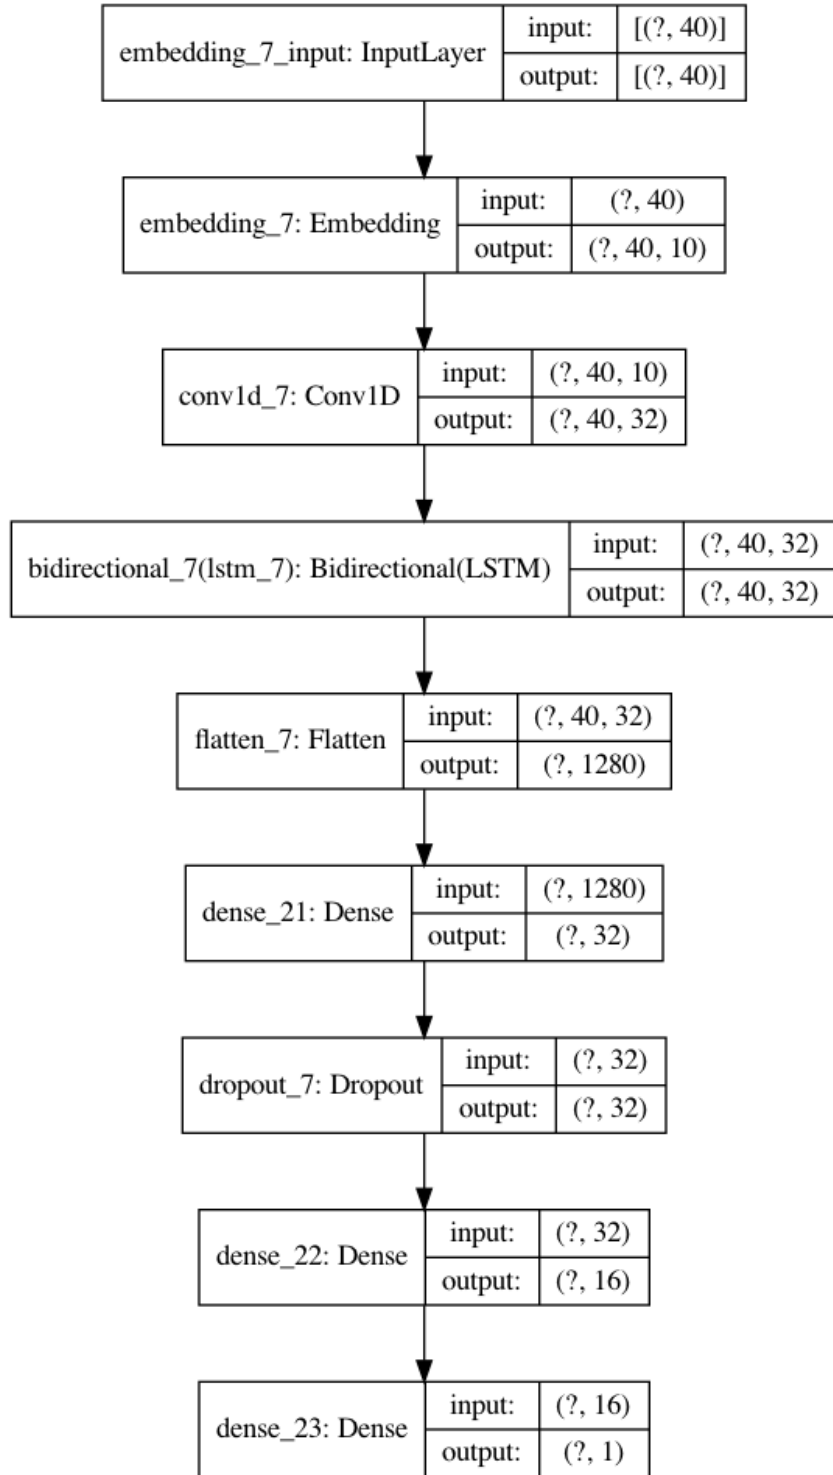

**Figure S1:** Detailed neural network model formulation, visual representation.

| Layer (type)                    | Output Shape   | Param # |
|---------------------------------|----------------|---------|
| embedding_7 (Embedding)         | (None, 40, 10) | 240     |
| conv1d_7 (Conv1D)               | (None, 40, 32) | 992     |
| bidirectional_7 (Bidirectional) | (None, 40, 32) | 6272    |
| flatten_7 (Flatten)             | (None, 1280)   | 0       |
| dense_21 (Dense)                | (None, 32)     | 40992   |
| dropout_7 (Dropout)             | (None, 32)     | 0       |
| dense_22 (Dense)                | (None, 16)     | 528     |
| dense_23 (Dense)                | (None, 1)      | 17      |
| =====                           |                |         |
| Total params: 49,041            |                |         |
| Trainable params: 49,041        |                |         |
| Non-trainable params: 0         |                |         |

**Figure S2:** Neural network model formulation with number of parameters featured in each layer, and in total.
