# Supplementary material
Source: PubMed Central journal article supplement (PMC9514290)
Supplement: NIHMS1826567-supplement-Table_S1.pdf [file NIHMS1826567-supplement-Table_S1.pdf]

| Sequences                            | Tm (C) |
|--------------------------------------|--------|
| GPOGPOGPOGPOGPOGPO                   | 36     |
| GPPGPPGPPGPPGPPGPP                   | 6.5    |
| GOTGOTGOTGOTGOTGOTGOTGOTGOTGOT       | 19.2   |
| GPOGPOGQOGLOGLOGPOGPOGPOGPO          | 41.3   |
| GPOGPOGPOGGQOGLOGLOGPOPOGPOGPOGGY    | 44     |
| GPOGPOGPOGQOGLOGLOGPOGPOGPOGPO       | 48     |
| GPOGPOGPOGPOGPOGPOGPOGPOGPO          | 58     |
| GFOGAAGRTGPOGPSGISGPOGPOGPOGPOGV     | 4      |
| GPOGAOGLGIAGITGARGLAGPOGPOGPOGPOGG   | 4      |
| GPRGNRGERGSEGSOGHOGQOGPOGPOGAOGV     | 4      |
| GPOGPOGPOGAKGDAGPOGPAGPOGPOGPOGY     | 42.8   |
| GPOGPOGPOGKRGKOGPOGPOGPOGG           | 32.3   |
| GARGPAGPQGPRGDKGETGPOGPOGPOGPOGV     | 30.8   |
| GPOGPOGROGRKGROGPOGPOGPOGPOGPOG      | 30     |
| GPOGPOGPKGQKGEKOGPOGPOGPOGPO         | 30     |
| GPOGIRGPKGQKGELOGLOGPOGPOGPOGPOGY    | 28.4   |
| GPOGPOGROGKRGKOGPOGPOGPOGG           | 26.9   |
| GPAGPAGPVGPAARGPAGPOGPOGPOGPOGV      | 26     |
| GPOGPOGPOGPOGPAAGPAGPVGPAARGPAGV     | 26     |
| GAOGERGPOGLAGAOLRGPOGPOGPOGPOGV      | 25.9   |
| GLAGEOGKOGIOGLOGRAGPOGPOGPOGPOGV     | 25.4   |
| GSOGAQGLQGPRGLOGTOGPOGPOGPOGPOGV     | 25     |
| GPAGPAGPVGPAARGPAGPOGPOGAOGPOGV      | 24.1   |
| GPOGPOGROGKRGKQGQKOGPOGPOGPOGPOG     | 23.9   |
| GPOGROGRRGROGLKGEQOGPOGPOGPOGPOGY    | 23.3   |
| GPAGPAGPVGPAARGPAGPOGPAAGPOGPOGV     | 23.2   |
| GDAGAOGERGPOGLAGAOGPOGPOGPOGPOGV     | 23.2   |
| GERGERGEKGERGEQGRDGPOGPOGPOGPOGV     | 23.2   |
| GINGFOGKDGRDGTKEKGEOGPOGPOGPOGPOGG   | 23     |
| GPOGPOGPOGRKGROGPOGPOGPOGG           | 22.2   |
| GPOGPOGROGKRGKQGPOGPOGPOGG           | 21.3   |
| GGKGDAGAOGERGPOGLAGPOGPOGPOGPOGV     | 20.9   |
| GPAGPAGPVGPAARGPAGPOGPOGPOGPOGY      | 20.6   |
| GPOGPOGRQKRGKOGPOGPOGPOGG            | 20.1   |
| GROGKRGKOGVRGPRGPOGPOGPOGPO          | 19.7   |
| GROGAAGAOGVRGPRGPOGPOGPOGPO          | 18.6   |
| GPOGPOGITGARGLAGPOGPOGPOGPO          | 18     |
| GFOGKDGRDGTKEKGEOGPOGPOGPOGPOGY      | 17.9   |
| GLAGAOLRGGAGPOGPEGPOGPOGPOGPOGV      | 17.5   |
| GPOGPOGROGKRGROGPOGPOGPOGG           | 17.4   |
| GERGPOLAGAOLRGGAGPOGPOGPOGPOGV       | 16.5   |
| GPOGLAGAOLRGGAGPOGPOGPOGPOGPOGV      | 15.8   |
| GROGKRGROGVRGPRGPOGPOGPOGPO          | 15.5   |
| GPSGPRGLOGPOGAOGPQGFQGPOGEOGPOGASGPM | 12     |
| GAOGRKGROGVAGPAGPOGPOGPOGPO          | 11     |
| GROGKRGKTKLKGDIGPOGPOGPOGPO          | 9.8    |
| GPOGPOGROGKRGKQGQKOGPOGPOGG          | 8.1    |
| GLOGMLGQKGMGPKGPOGPOGPOGPO           | 7      |

|                             |      |
|-----------------------------|------|
| GPOGPOGPOGPOGPOGPOGPO       | 45.5 |
| GPOGPOGPOGPAGPOGPOGPOGPO    | 45.5 |
| GPOGPOGPOGPAGPOGPOGPAGPOGPO | 42.8 |
| GPOGPOGPOGPAGPOGPOGPAGPOGPO | 42.2 |
| GPOGPOGPOGAOGPOGPOGPOGPO    | 40.6 |
| GPOGPOGPOGPOGPAGPAGPOGPO    | 40.4 |
| GPOGPOGPOGAOGPOGPOGPOGPO    | 39.9 |
| GPOGPOGPOGAAGPOGPOGPOGPO    | 38.2 |
| GPOGPOGPOGPKGPOGPOGPOGPO    | 36.8 |
| GPRGPRGPRGPRGPRGPRGPRGPR    | 32.6 |
| GPOGPOGPOGAKGPOGPOGPOGPO    | 30.8 |
| GPOGPOGPOGPOGPOGPOGPOGPO    | 44.5 |
| GPOGPOGPOGLAGPOGPOGPOGPO    | 29.5 |
| GPOGPOGPOGAOGPOGPOGPOGPO    | 39.9 |
| GPOGPOGPOGAAGPOGPOGPOGPO    | 29.3 |
| GPOGPOGPOGLOGPOGPOGPOGPO    | 39   |
| GPOGPOGPOGPFPGPOGPOGPOGPO   | 28.3 |
| GPOGPOGPOGPAGPOGPOGPOGPO    | 38.3 |
| GPOGPOGPOGALGPOGPOGPOGPO    | 27.8 |
| GPOGPOGPOGFOGPOGPOGPOGPO    | 33.5 |
| GPOGPOGPOGFAGPOGPOGPOGPO    | 23.4 |
| GPOGPOGPOGPLGPOGPOGPOGPO    | 32.7 |
| GPOGPOGPOGAFGPOGPOGPOGPO    | 20.7 |
| GPOGPOGPOGDOGPOGPOGPOGPO    | 40.1 |
| GPOGPOGPOGPDGPOGPOGPOGPO    | 30.1 |
| GPOGPOGPOGEOGPOGPOGPOGPO    | 42.9 |
| GPOGPOGPOGPEGPOGPOGPOGPO    | 39.7 |
| GPOGPOGPOGKOGPOGPOGPOGPO    | 41.5 |
| GPOGPOGPOGPKGPOGPOGPOGPO    | 36.8 |
| GPOGPOGPOGROGPOGPOGPOGPO    | 40.6 |
| GPOGPOGPOGPRGPOGPOGPOGPO    | 44.5 |
| GPOGPOGPOGDKGPOGPOGPOGPO    | 30.9 |
| GPOGPOGPOGKDGPOGPOGPOGPO    | 35.5 |
| GPOGPOGPOGDRGPOGPOGPOGPO    | 37.1 |
| GPOGPOGPOGRDGPOGPOGPOGPO    | 35   |
| GPOGPOGPOGKEGPOGPOGPOGPO    | 35   |
| GPOGPOGPOGKEGPOGPOGPOGPO    | 35.3 |
| GPOGPOGPOGERGPOGPOGPOGPO    | 40.4 |
| GPOGPOGPOGREGPOGPOGPOGPO    | 33.8 |
| GPOGPOGPOGAOGPOGPOGPOGPO    | 39.9 |
| GPOGPOGPOGPAGPOGPOGPOGPO    | 38.3 |
| GPOGPOGPOGPOGPOGPOGPOGPO    | 44.5 |
| GPOGPOGPOGAAGPOGPOGPOGPO    | 29.3 |
| GPOGPOGPOGPOGPP             | 12   |
| GPAGPOGPOGPOGPOGPP          | 21   |
| GPAGPAGPOGPOGPOGPOGPP       | 31   |
| GAAGPAGPOGPOGPOGPOGPP       | 31   |
| GAAGAAGPAGPOGPOGPOGPOGPP    | 23   |
| GPOGAAGPAGPOGPOGPOGPOGPP    | 30   |

|                                   |      |
|-----------------------------------|------|
| GPAGAAGPAGPOGPOGPOGPOGPP          | 25   |
| GAAGPAGAAGPAGPOGPOGPOGPOGPP       | 26   |
| GPOGAAGPAGAAGPAGPOGPOGPOGPOGPP    | 26   |
| GPOGPOGAAGPAGAAGPAGPOGPOGPOGPOGPP | 31   |
| GIAGPAGPOGPOGPOGPOGPP             | 26   |
| GPOGIAGPAGPOGPOGPOGPOGPP          | 27   |
| GSOGPOGPOGPOGPOGPP                | 21   |
| GPOGPOGPOGPOGPOGPP                | 21   |
| GAAGPOGPOGPOGPOGPOGPP             | 31   |
| GPAGPAGPAGPOGPOGPOGPOGPP          | 32   |
| GPOGPOGPPGPOGPOGPO                | 30.5 |
| GPOGPOGPOGPOGPOGPO                | 36   |
| GPOGPOGPKGEOGPOGPOGPO             | 51   |
| GPOGPOGPKGDOGPOGPOGPO             | 48   |
| GPOGPOGPOGPOGPOGPOGPO             | 50.5 |
| GPOGPOGPKGPOGPOGPOGPO             | 42   |
| GPOGPOGPOGSOGPOGPOGPO             | 44   |
| GPOGPOGPOGSOGPOGPOGPO             | 45.5 |
| GPOGPOGPOGTOGPOGPOGPO             | 39.5 |
| GPOGPOGPOGTOGPOGPOGPO             | 46.5 |
| GPOGPOGPKGSOGPOGPOGPO             | 36.5 |
| GPOGPOGPKGSOGPOGPOGPO             | 49.5 |
| GPOGPOGPKGTOGPOGPOGPO             | 30   |
| GPOGPOGPKGTOGPOGPOGPO             | 38.5 |
| GPOGPOGPOGPOGPOGPOGPOGPO          | 47.3 |
| GPOGPOGPOGEOGPOGPOGPOGPO          | 42.9 |
| GPOGPOGPOGAOGPOGPOGPOGPO          | 41.7 |
| GPOGPOGPOGKOGPOGPOGPOGPO          | 41.5 |
| GPOGPOGPOGROGPOGPOGPOGPO          | 40.6 |
| GPOGPOGPOGQOGPOGPOGPOGPO          | 40.4 |
| GPOGPOGPOGDOGPOGPOGPOGPO          | 40.1 |
| GPOGPOGPOGLOGPOGPOGPOGPO          | 39   |
| GPOGPOGPOGVOGPOGPOGPOGPO          | 38.9 |
| GPOGPOGPOGMOGPOGPOGPOGPO          | 38.6 |
| GPOGPOGPOGIOGPOGPOGPOGPO          | 38.4 |
| GPOGPOGPOGNOGPOGPOGPOGPO          | 38.3 |
| GPOGPOGPOGSOGPOGPOGPOGPO          | 38   |
| GPOGPOGPOGHOGPOGPOGPOGPO          | 36.5 |
| GPOGPOGPOGTOGPOGPOGPOGPO          | 36.2 |
| GPOGPOGPOGCOGPOGPOGPOGPO          | 36.1 |
| GPOGPOGPOGYOGPOGPOGPOGPO          | 34.3 |
| GPOGPOGPOGFOGPOGPOGPOGPO          | 33.5 |
| GPOGPOGPOGGOGPOGPOGPOGPO          | 33.2 |
| GPOGPOGPOGVOGPOGPOGPOGPO          | 31.9 |
| GPOGPOGPOGPOGPOGPOGPOGPO          | 47.3 |
| GPOGPOGPOGPRGPOGPOGPOGPO          | 47.2 |
| GPOGPOGPOGPMGPOGPOGPOGPO          | 42.6 |
| GPOGPOGPOGPIGPOGPOGPOGPO          | 41.5 |
| GPOGPOGPOGPQGPOGPOGPOGPO          | 41.3 |

|                          |      |
|--------------------------|------|
| GPOGPOGPOGPAGPOGPOGPOGPO | 40.9 |
| GPOGPOGPOGPGVPOGPOGPOGPO | 40   |
| GPOGPOGPOGPEGPOGPOGPOGPO | 39.7 |
| GPOGPOGPOGPTGPOGPOGPOGPO | 39.7 |
| GPOGPOGPOGPCGPOGPOGPOGPO | 37.7 |
| GPOGPOGPOGPGVPOGPOGPOGPO | 36.8 |
| GPOGPOGPOGPHGPOGPOGPOGPO | 35.7 |
| GPOGPOGPOGPSGPOGPOGPOGPO | 35   |
| GPOGPOGPOGPDGPOGPOGPOGPO | 34   |
| GPOGPOGPOGPGGPOGPOGPOGPO | 32.7 |
| GPOGPOGPOGPLGPOGPOGPOGPO | 31.7 |
| GPOGPOGPOGPGVPOGPOGPOGPO | 30.3 |
| GPOGPOGPOGPGYPOGPOGPOGPO | 30.2 |
| GPOGPOGPOGPGFPOGPOGPOGPO | 28.3 |
| GPOGPOGPOGPGWPOGPOGPOGPO | 26.1 |
| GPOGPOGPOGPOGPOGPOGPOGPO | 47.3 |
| GPOGPOGPOGEGPOGPOGPOGPO  | 42.9 |
| GPOGPOGPOGAGPOGPOGPOGPO  | 41.7 |
| GPOGPOGPOGKOGPOGPOGPOGPO | 41.5 |
| GPOGPOGPOGRGPOGPOGPOGPO  | 40.6 |
| GPOGPOGPOGQOGPOGPOGPOGPO | 40.4 |
| GPOGPOGPOGDOGPOGPOGPOGPO | 40.1 |
| GPOGPOGPOGLOGPOGPOGPOGPO | 39   |
| GPOGPOGPOGVOGPOGPOGPOGPO | 38.9 |
| GPOGPOGPOGMOGPOGPOGPOGPO | 38.6 |
| GPOGPOGPOGIOGPOGPOGPOGPO | 38.4 |
| GPOGPOGPOGNOGPOGPOGPOGPO | 38.3 |
| GPOGPOGPOGSOGPOGPOGPOGPO | 38   |
| GPOGPOGPOGHGPOGPOGPOGPO  | 36.5 |
| GPOGPOGPOGTGPOGPOGPOGPO  | 36.2 |
| GPOGPOGPOGCOGPOGPOGPOGPO | 36.1 |
| GPOGPOGPOGYGPOGPOGPOGPO  | 34.3 |
| GPOGPOGPOGFOGPOGPOGPOGPO | 33.5 |
| GPOGPOGPOGGGPOGPOGPOGPO  | 33.2 |
| GPOGPOGPOGWGPOGPOGPOGPO  | 31.9 |
| GPOGPOGPOGPPGPOGPOGPOGPO | 45.5 |
| GPOGPOGPOGEPGPOGPOGPOGPO | 41.1 |
| GPOGPOGPOGAPGPOGPOGPOGPO | 37.7 |
| GPOGPOGPOGKPGPOGPOGPOGPO | 39.7 |
| GPOGPOGPOGRPGPOGPOGPOGPO | 38.8 |
| GPOGPOGPOGQPGPOGPOGPOGPO | 38.6 |
| GPOGPOGPOGDPGPOGPOGPOGPO | 38.3 |
| GPOGPOGPOGLPGPOGPOGPOGPO | 37.2 |
| GPOGPOGPOGVPGPOGPOGPOGPO | 37.1 |
| GPOGPOGPOGMPGPOGPOGPOGPO | 36.8 |
| GPOGPOGPOGIPGPOGPOGPOGPO | 36.6 |
| GPOGPOGPOGNPGPOGPOGPOGPO | 36.5 |
| GPOGPOGPOGSPGPOGPOGPOGPO | 36.2 |
| GPOGPOGPOGHPGPOGPOGPOGPO | 34.7 |

|                           |      |
|---------------------------|------|
| GPOGPOGPOGTPGPOGPOGPOGPO  | 34.4 |
| GPOGPOGPOGCPGPOGPOGPOGPO  | 34.3 |
| GPOGPOGPOGYPGPOGPOGPOGPO  | 32.5 |
| GPOGPOGPOGFPGPOGPOGPOGPO  | 31.7 |
| GPOGPOGPOGGPGPOGPOGPOGPO  | 31.4 |
| GPOGPOGPOGWPGPOGPOGPOGPO  | 30.1 |
| GPOGPOGPOGPRGPOGPOGPOGPO  | 47.2 |
| GPOGPOGPOGERGPOGPOGPOGPO  | 40.4 |
| GPOGPOGPOGARPGPOGPOGPOGPO | 38.2 |
| GPOGPOGPOGKRGPOGPOGPOGPO  | 39.1 |
| GPOGPOGPOGRRGPOGPOGPOGPO  | 38   |
| GPOGPOGPOGQRGPOGPOGPOGPO  | 39.5 |
| GPOGPOGPOGDRGPOGPOGPOGPO  | 37.1 |
| GPOGPOGPOGLRGPOGPOGPOGPO  | 36.4 |
| GPOGPOGPOGVRGPOGPOGPOGPO  | 36.3 |
| GPOGPOGPOGMRGPOGPOGPOGPO  | 36   |
| GPOGPOGPOGIRGPOGPOGPOGPO  | 35.8 |
| GPOGPOGPOGNRGPOGPOGPOGPO  | 35.7 |
| GPOGPOGPOGSRGPOGPOGPOGPO  | 35.4 |
| GPOGPOGPOGHRGPOGPOGPOGPO  | 33.9 |
| GPOGPOGPOGTRGPOGPOGPOGPO  | 33.6 |
| GPOGPOGPOGCRGPOGPOGPOGPO  | 33.5 |
| GPOGPOGPOGYRGPOGPOGPOGPO  | 31.7 |
| GPOGPOGPOGFRGPOGPOGPOGPO  | 30.9 |
| GPOGPOGPOGGRGPOGPOGPOGPO  | 30.6 |
| GPOGPOGPOGWRGPOGPOGPOGPO  | 29.3 |
| GPOGPOGPOGPMGPOGPOGPOGPO  | 42.6 |
| GPOGPOGPOGEMGPOGPOGPOGPO  | 38.2 |
| GPOGPOGPOGAMGPOGPOGPOGPO  | 37   |
| GPOGPOGPOGKMGPOGPOGPOGPO  | 36.8 |
| GPOGPOGPOGRMGPOGPOGPOGPO  | 35.9 |
| GPOGPOGPOGQMGPOGPOGPOGPO  | 35.7 |
| GPOGPOGPOGDMGPOGPOGPOGPO  | 35.4 |
| GPOGPOGPOGLMGPOGPOGPOGPO  | 34.3 |
| GPOGPOGPOGVMGPOGPOGPOGPO  | 34.2 |
| GPOGPOGPOGMMGPOGPOGPOGPO  | 33.9 |
| GPOGPOGPOGIMGPOGPOGPOGPO  | 33.7 |
| GPOGPOGPOGNMGPOGPOGPOGPO  | 33.6 |
| GPOGPOGPOGSMGPOGPOGPOGPO  | 33.3 |
| GPOGPOGPOGHMGPOGPOGPOGPO  | 31.8 |
| GPOGPOGPOGTMGPOGPOGPOGPO  | 31.6 |
| GPOGPOGPOGCMGPOGPOGPOGPO  | 31.4 |
| GPOGPOGPOGYMGPOGPOGPOGPO  | 29.6 |
| GPOGPOGPOGFMGPOGPOGPOGPO  | 28.8 |
| GPOGPOGPOGGMGPOGPOGPOGPO  | 28.5 |
| GPOGPOGPOGWMGPOGPOGPOGPO  | 27.2 |
| GPOGPOGPOGPIGPOGPOGPOGPO  | 41.5 |
| GPOGPOGPOGEIGPOGPOGPOGPO  | 37.1 |
| GPOGPOGPOGAIGPOGPOGPOGPO  | 35.9 |

|                           |      |
|---------------------------|------|
| GPOGPOGPOGKIGPOGPOGPOGPO  | 35.7 |
| GPOGPOGPOGRIGPOGPOGPOGPO  | 34.8 |
| GPOGPOGPOGQIGPOGPOGPOGPO  | 34.6 |
| GPOGPOGPOGDIGPOGPOGPOGPO  | 34.3 |
| GPOGPOGPOGLIGPOGPOGPOGPO  | 33.2 |
| GPOGPOGPOGVIGPOGPOGPOGPO  | 33.1 |
| GPOGPOGPOGMIGPOGPOGPOGPO  | 32.8 |
| GPOGPOGPOGIIIGPOGPOGPOGPO | 32.6 |
| GPOGPOGPOGNIGPOGPOGPOGPO  | 32.5 |
| GPOGPOGPOGSIGPOGPOGPOGPO  | 32.2 |
| GPOGPOGPOGHIGPOGPOGPOGPO  | 30.7 |
| GPOGPOGPOGTIGPOGPOGPOGPO  | 30.4 |
| GPOGPOGPOGCIGPOGPOGPOGPO  | 30.3 |
| GPOGPOGPOGYIGPOGPOGPOGPO  | 28.5 |
| GPOGPOGPOGFIGPOGPOGPOGPO  | 27.7 |
| GPOGPOGPOGGIGPOGPOGPOGPO  | 27.4 |
| GPOGPOGPOGWIGPOGPOGPOGPO  | 26.1 |
| GPOGPOGPOGPQGPOGPOGPOGPO  | 41.3 |
| GPOGPOGPOGEQGPOGPOGPOGPO  | 37.7 |
| GPOGPOGPOGAQGPOGPOGPOGPO  | 35.7 |
| GPOGPOGPOGKQGPOGPOGPOGPO  | 38.9 |
| GPOGPOGPOGRQGPOGPOGPOGPO  | 34.6 |
| GPOGPOGPOGQQGPOGPOGPOGPO  | 34.4 |
| GPOGPOGPOGDQGPOGPOGPOGPO  | 34.1 |
| GPOGPOGPOGLQGPOGPOGPOGPO  | 35.7 |
| GPOGPOGPOGVQGPOGPOGPOGPO  | 32.9 |
| GPOGPOGPOGMQGPOGPOGPOGPO  | 32.6 |
| GPOGPOGPOGIQGPOGPOGPOGPO  | 32.4 |
| GPOGPOGPOGNQGPOGPOGPOGPO  | 32.3 |
| GPOGPOGPOGSQGPOGPOGPOGPO  | 32   |
| GPOGPOGPOGHQGPOGPOGPOGPO  | 30.5 |
| GPOGPOGPOGTQGPOGPOGPOGPO  | 30.2 |
| GPOGPOGPOGCQGPOGPOGPOGPO  | 30.1 |
| GPOGPOGPOGYQGPOGPOGPOGPO  | 28.3 |
| GPOGPOGPOGFQGPOGPOGPOGPO  | 27.5 |
| GPOGPOGPOGGQGPOGPOGPOGPO  | 27.2 |
| GPOGPOGPOGWQGPOGPOGPOGPO  | 25.9 |
| GPOGPOGPOGPAGPOGPOGPOGPO  | 40.9 |
| GPOGPOGPOGEAGPOGPOGPOGPO  | 34.6 |
| GPOGPOGPOGAAGPOGPOGPOGPO  | 32.9 |
| GPOGPOGPOGKAGPOGPOGPOGPO  | 35.1 |
| GPOGPOGPOGRAGPOGPOGPOGPO  | 34.2 |
| GPOGPOGPOGQAGPOGPOGPOGPO  | 34   |
| GPOGPOGPOGDAGPOGPOGPOGPO  | 31.6 |
| GPOGPOGPOGLAGPOGPOGPOGPO  | 31.2 |
| GPOGPOGPOGVAGPOGPOGPOGPO  | 32.5 |
| GPOGPOGPOGMAGPOGPOGPOGPO  | 32.2 |
| GPOGPOGPOGIAGPOGPOGPOGPO  | 33.9 |
| GPOGPOGPOGNAGPOGPOGPOGPO  | 31.9 |

|                          |      |
|--------------------------|------|
| GPOGPOGPOGSAGPOGPOGPOGPO | 31.6 |
| GPOGPOGPOGHAGPOGPOGPOGPO | 30.1 |
| GPOGPOGPOGTAGPOGPOGPOGPO | 29.8 |
| GPOGPOGPOGCAGPOGPOGPOGPO | 29.7 |
| GPOGPOGPOGYAGPOGPOGPOGPO | 27.9 |
| GPOGPOGPOGFAGPOGPOGPOGPO | 24.1 |
| GPOGPOGPOGGAGPOGPOGPOGPO | 26   |
| GPOGPOGPOGWAGPOGPOGPOGPO | 25.5 |
| GPOGPOGPOGPVGPOGPOGPOGPO | 40   |
| GPOGPOGPOGEVGPOGPOGPOGPO | 35.3 |
| GPOGPOGPOGAVGPOGPOGPOGPO | 34.4 |
| GPOGPOGPOGKVGPOGPOGPOGPO | 34.2 |
| GPOGPOGPOGRVGPOGPOGPOGPO | 33.3 |
| GPOGPOGPOGQVGPOGPOGPOGPO | 33.1 |
| GPOGPOGPOGDVGPOGPOGPOGPO | 32.8 |
| GPOGPOGPOGLVGPOGPOGPOGPO | 31.7 |
| GPOGPOGPOGVVGPOGPOGPOGPO | 31.6 |
| GPOGPOGPOGMVGPOGPOGPOGPO | 31.3 |
| GPOGPOGPOGIVGPOGPOGPOGPO | 31.1 |
| GPOGPOGPOGNVGPOGPOGPOGPO | 31   |
| GPOGPOGPOGSVGPOGPOGPOGPO | 30.7 |
| GPOGPOGPOGHVGPOGPOGPOGPO | 29.2 |
| GPOGPOGPOGTVGPOGPOGPOGPO | 28.9 |
| GPOGPOGPOGCVGPOGPOGPOGPO | 28.8 |
| GPOGPOGPOGYVGPOGPOGPOGPO | 27   |
| GPOGPOGPOGFVGPOGPOGPOGPO | 26.2 |
| GPOGPOGPOGGVGPOGPOGPOGPO | 25.9 |
| GPOGPOGPOGWVGPOGPOGPOGPO | 24.6 |
| GPOGPOGPOGPEGPOGPOGPOGPO | 39.7 |
| GPOGPOGPOGEEGPOGPOGPOGPO | 35.3 |
| GPOGPOGPOGAEGPOGPOGPOGPO | 34.1 |
| GPOGPOGPOGKEGPOGPOGPOGPO | 35.3 |
| GPOGPOGPOGREGPOGPOGPOGPO | 33.8 |
| GPOGPOGPOGQEGPOGPOGPOGPO | 32.8 |
| GPOGPOGPOGDEGPOGPOGPOGPO | 32.5 |
| GPOGPOGPOGLEGPOGPOGPOGPO | 31.4 |
| GPOGPOGPOGVEGPOGPOGPOGPO | 31.3 |
| GPOGPOGPOGMEGPOGPOGPOGPO | 31   |
| GPOGPOGPOGIEGPOGPOGPOGPO | 30.8 |
| GPOGPOGPOGNEGPOGPOGPOGPO | 30.7 |
| GPOGPOGPOGSEGPOGPOGPOGPO | 30.4 |
| GPOGPOGPOGHEGPOGPOGPOGPO | 28.9 |
| GPOGPOGPOGTEGPOGPOGPOGPO | 28.6 |
| GPOGPOGPOGCEGPOGPOGPOGPO | 28.5 |
| GPOGPOGPOGYEGPOGPOGPOGPO | 26.7 |
| GPOGPOGPOGFEGPOGPOGPOGPO | 25.9 |
| GPOGPOGPOGGEGPOGPOGPOGPO | 25.6 |
| GPOGPOGPOGWEGPOGPOGPOGPO | 24.3 |
| GPOGPOGPOGPTGPOGPOGPOGPO | 39.7 |

|                          |      |
|--------------------------|------|
| GPOGPOGPOGETGPOGPOGPOGPO | 35.9 |
| GPOGPOGPOGATGPOGPOGPOGPO | 34.1 |
| GPOGPOGPOGKTGPOGPOGPOGPO | 33.9 |
| GPOGPOGPOGRTGPOGPOGPOGPO | 33   |
| GPOGPOGPOGQTGPOGPOGPOGPO | 32.8 |
| GPOGPOGPOGDTGPOGPOGPOGPO | 32.5 |
| GPOGPOGPOGLTGPOGPOGPOGPO | 31.4 |
| GPOGPOGPOGVTGPOGPOGPOGPO | 31.3 |
| GPOGPOGPOGMTGPOGPOGPOGPO | 31   |
| GPOGPOGPOGITGPOGPOGPOGPO | 30.8 |
| GPOGPOGPOGNTGPOGPOGPOGPO | 30.7 |
| GPOGPOGPOGSTGPOGPOGPOGPO | 30.4 |
| GPOGPOGPOGHTGPOGPOGPOGPO | 28.9 |
| GPOGPOGPOGTTGPOGPOGPOGPO | 28.6 |
| GPOGPOGPOGCTGPOGPOGPOGPO | 28.5 |
| GPOGPOGPOGYTGPOGPOGPOGPO | 26.7 |
| GPOGPOGPOGFTGPOGPOGPOGPO | 25.9 |
| GPOGPOGPOGGTGPOGPOGPOGPO | 25.6 |
| GPOGPOGPOGWTGPOGPOGPOGPO | 24.3 |
| GPOGPOGPOGPCGPOGPOGPOGPO | 37.7 |
| GPOGPOGPOGECGPOGPOGPOGPO | 33.3 |
| GPOGPOGPOGACGPOGPOGPOGPO | 32.1 |
| GPOGPOGPOGKCGPOGPOGPOGPO | 31.9 |
| GPOGPOGPOGRCGPOGPOGPOGPO | 31   |
| GPOGPOGPOGQCGPOGPOGPOGPO | 30.8 |
| GPOGPOGPOGDCGPOGPOGPOGPO | 30.5 |
| GPOGPOGPOGLCGPOGPOGPOGPO | 29.4 |
| GPOGPOGPOGVCGPOGPOGPOGPO | 29.3 |
| GPOGPOGPOGMCGPOGPOGPOGPO | 29   |
| GPOGPOGPOGICGPOGPOGPOGPO | 28.8 |
| GPOGPOGPOGNCGPOGPOGPOGPO | 28.7 |
| GPOGPOGPOGSCGPOGPOGPOGPO | 28.4 |
| GPOGPOGPOGHCPOGPOGPOGPO  | 26.9 |
| GPOGPOGPOGTCGPOGPOGPOGPO | 26.6 |
| GPOGPOGPOGCCGPOGPOGPOGPO | 26.5 |
| GPOGPOGPOGYCGPOGPOGPOGPO | 24.7 |
| GPOGPOGPOGFCGPOGPOGPOGPO | 23.9 |
| GPOGPOGPOGGCGPOGPOGPOGPO | 23.6 |
| GPOGPOGPOGWCGPOGPOGPOGPO | 22.3 |
| GPOGPOGPOGPKGPOGPOGPOGPO | 36.8 |
| GPOGPOGPOGEKGPOGPOGPOGPO | 35   |
| GPOGPOGPOGAKGPOGPOGPOGPO | 30.8 |
| GPOGPOGPOGKKGPOGPOGPOGPO | 31   |
| GPOGPOGPOGRKGPOGPOGPOGPO | 29.5 |
| GPOGPOGPOGQKGPOGPOGPOGPO | 32.6 |
| GPOGPOGPOGDKGPOGPOGPOGPO | 30.9 |
| GPOGPOGPOGLKGPOGPOGPOGPO | 31.1 |
| GPOGPOGPOGVKGPOGPOGPOGPO | 32.5 |
| GPOGPOGPOGMKGPOGPOGPOGPO | 31.7 |



|                          |      |
|--------------------------|------|
| GPOGPOGPOGIKGPOGPOGPOGPO | 27.9 |
| GPOGPOGPOGNKGPOGPOGPOGPO | 27.8 |
| GPOGPOGPOGSKGPOGPOGPOGPO | 27.5 |
| GPOGPOGPOGHKGPOGPOGPOGPO | 26   |
| GPOGPOGPOGTKGPOGPOGPOGPO | 25.7 |
| GPOGPOGPOGCKGPOGPOGPOGPO | 25.6 |
| GPOGPOGPOGYKGPOGPOGPOGPO | 23.8 |
| GPOGPOGPOGFKGPOGPOGPOGPO | 23   |
| GPOGPOGPOGGKGPOGPOGPOGPO | 26.9 |
| GPOGPOGPOGWKGPOGPOGPOGPO | 21.4 |
| GPOGPOGPOGPHGPOGPOGPOGPO | 35.7 |
| GPOGPOGPOGEHGPOGPOGPOGPO | 31.3 |
| GPOGPOGPOGAHGPOGPOGPOGPO | 30.1 |
| GPOGPOGPOGKHGPOGPOGPOGPO | 29.9 |
| GPOGPOGPOGRHGPOGPOGPOGPO | 29   |
| GPOGPOGPOGQHGPOGPOGPOGPO | 28.8 |
| GPOGPOGPOGDHGPOGPOGPOGPO | 28.5 |
| GPOGPOGPOGLHGPOGPOGPOGPO | 27.4 |
| GPOGPOGPOGVHGPOGPOGPOGPO | 27.3 |
| GPOGPOGPOGMHGPOGPOGPOGPO | 27   |
| GPOGPOGPOGIHGPOGPOGPOGPO | 26.8 |
| GPOGPOGPOGNHGPOGPOGPOGPO | 26.7 |
| GPOGPOGPOGSHGPOGPOGPOGPO | 26.4 |
| GPOGPOGPOGHHGPOGPOGPOGPO | 24.9 |
| GPOGPOGPOGTHGPOGPOGPOGPO | 24.6 |
| GPOGPOGPOGCHGPOGPOGPOGPO | 24.5 |
| GPOGPOGPOGYHGPOGPOGPOGPO | 22.7 |
| GPOGPOGPOGFHGPOGPOGPOGPO | 21.9 |
| GPOGPOGPOGGHGPOGPOGPOGPO | 21.6 |
| GPOGPOGPOGWHGPOGPOGPOGPO | 20.3 |
| GPOGPOGPOGPSGPOGPOGPOGPO | 35   |
| GPOGPOGPOGESGPOGPOGPOGPO | 30.6 |
| GPOGPOGPOGASGPOGPOGPOGPO | 33   |
| GPOGPOGPOGKSGPOGPOGPOGPO | 29.2 |
| GPOGPOGPOGRSGPOGPOGPOGPO | 30.5 |
| GPOGPOGPOGQSGPOGPOGPOGPO | 28.1 |
| GPOGPOGPOGDSGPOGPOGPOGPO | 27.8 |
| GPOGPOGPOGLSGPOGPOGPOGPO | 26.7 |
| GPOGPOGPOGVSGPOGPOGPOGPO | 26.6 |
| GPOGPOGPOGMSGPOGPOGPOGPO | 26.3 |
| GPOGPOGPOGISGPOGPOGPOGPO | 26.1 |
| GPOGPOGPOGNSGPOGPOGPOGPO | 26   |
| GPOGPOGPOGSSGPOGPOGPOGPO | 25.7 |
| GPOGPOGPOGHSgPOGPOGPOGPO | 24.2 |
| GPOGPOGPOGTSGPOGPOGPOGPO | 23.9 |
| GPOGPOGPOGCSGPOGPOGPOGPO | 23.8 |
| GPOGPOGPOGYSGPOGPOGPOGPO | 22   |
| GPOGPOGPOGFSGPOGPOGPOGPO | 21.2 |
| GPOGPOGPOGGSgPOGPOGPOGPO | 20.9 |

|                          |      |
|--------------------------|------|
| GPOGPOGPOGWSGPOGPOGPOGPO | 19.6 |
| GPOGPOGPOGPDGPOGPOGPOGPO | 34   |
| GPOGPOGPOGEDGPOGPOGPOGPO | 29.7 |
| GPOGPOGPOGADGPOGPOGPOGPO | 33   |
| GPOGPOGPOGKDGPOGPOGPOGPO | 35.8 |
| GPOGPOGPOGRDGPOGPOGPOGPO | 34.5 |
| GPOGPOGPOGQDGPOGPOGPOGPO | 27.1 |
| GPOGPOGPOGDDGPOGPOGPOGPO | 26.8 |
| GPOGPOGPOGLDGPOGPOGPOGPO | 2.7  |
| GPOGPOGPOGVDGPOGPOGPOGPO | 25.6 |
| GPOGPOGPOGMDGPOGPOGPOGPO | 25.3 |
| GPOGPOGPOGIDGPOGPOGPOGPO | 25.1 |
| GPOGPOGPOGNDGPOGPOGPOGPO | 25   |
| GPOGPOGPOGSDGPOGPOGPOGPO | 24.7 |
| GPOGPOGPOGHDGPOGPOGPOGPO | 23.2 |
| GPOGPOGPOGTDGPOGPOGPOGPO | 22.9 |
| GPOGPOGPOGCDGPOGPOGPOGPO | 22.8 |
| GPOGPOGPOGYDGPOGPOGPOGPO | 21   |
| GPOGPOGPOGFDGPOGPOGPOGPO | 20.2 |
| GPOGPOGPOGGDGPOGPOGPOGPO | 19.9 |
| GPOGPOGPOGWDGPOGPOGPOGPO | 18.6 |
| GPOGPOGPOGPGGPOGPOGPOGPO | 32.9 |
| GPOGPOGPOGEGGPOGPOGPOGPO | 28.5 |
| GPOGPOGPOGAGGPOGPOGPOGPO | 27.3 |
| GPOGPOGPOGKGGPOGPOGPOGPO | 27.1 |
| GPOGPOGPOGRGGPOGPOGPOGPO | 26.2 |
| GPOGPOGPOGQGGPOGPOGPOGPO | 26   |
| GPOGPOGPOGDGGPOGPOGPOGPO | 25.7 |
| GPOGPOGPOGLGGPOGPOGPOGPO | 24.6 |
| GPOGPOGPOGVGGPOGPOGPOGPO | 24.5 |
| GPOGPOGPOGMGGPOGPOGPOGPO | 24.2 |
| GPOGPOGPOGIGGPOGPOGPOGPO | 24   |
| GPOGPOGPOGNGGPOGPOGPOGPO | 23.9 |
| GPOGPOGPOGSGGPOGPOGPOGPO | 23.6 |
| GPOGPOGPOGHGGPOGPOGPOGPO | 22.1 |
| GPOGPOGPOGTGGPOGPOGPOGPO | 21.8 |
| GPOGPOGPOGCGGPOGPOGPOGPO | 21.7 |
| GPOGPOGPOGYGGPOGPOGPOGPO | 19.9 |
| GPOGPOGPOGFGGPOGPOGPOGPO | 19.1 |
| GPOGPOGPOGGGGPOGPOGPOGPO | 18.8 |
| GPOGPOGPOGWGGPOGPOGPOGPO | 17.5 |
| GPOGPOGPOGPLGPOGPOGPOGPO | 32.7 |
| GPOGPOGPOGELGPOGPOGPOGPO | 28.3 |
| GPOGPOGPOGALGPOGPOGPOGPO | 27.8 |
| GPOGPOGPOGKLGPOGPOGPOGPO | 26.9 |
| GPOGPOGPOGRLGPOGPOGPOGPO | 26   |
| GPOGPOGPOGQLGPOGPOGPOGPO | 25.8 |
| GPOGPOGPOGDLGPOGPOGPOGPO | 25.5 |
| GPOGPOGPOGLLGPOGPOGPOGPO | 26.9 |

|                           |      |
|---------------------------|------|
| GPOGPOGPOGVLGPOGPOGPOGPO  | 24.3 |
| GPOGPOGPOGMLGPOGPOGPOGPO  | 24   |
| GPOGPOGPOGILGPOGPOGPOGPO  | 23.8 |
| GPOGPOGPOGNLGPOGPOGPOGPO  | 23.7 |
| GPOGPOGPOGSLGPOGPOGPOGPO  | 23.4 |
| GPOGPOGPOGHLGPOGPOGPOGPO  | 21.9 |
| GPOGPOGPOGTLGPOGPOGPOGPO  | 21.6 |
| GPOGPOGPOGCLGPOGPOGPOGPO  | 21.5 |
| GPOGPOGPOGYLGPOGPOGPOGPO  | 19.7 |
| GPOGPOGPOGFLGPOGPOGPOGPO  | 18.9 |
| GPOGPOGPOGGLGPOGPOGPOGPO  | 25.3 |
| GPOGPOGPOGWLGPOGPOGPOGPO  | 17.3 |
| GPOGPOGPOGPNLPOGPOGPOGPO  | 31.7 |
| GPOGPOGPOGENGPOGPOGPOGPO  | 29.5 |
| GPOGPOGPOGANGPOGPOGPOGPO  | 26.1 |
| GPOGPOGPOGKNGPOGPOGPOGPO  | 31.7 |
| GPOGPOGPOGRNGPOGPOGPOGPO  | 25   |
| GPOGPOGPOGQNGPOGPOGPOGPO  | 24.8 |
| GPOGPOGPOGDNGPOGPOGPOGPO  | 24.5 |
| GPOGPOGPOGLNGPOGPOGPOGPO  | 23.4 |
| GPOGPOGPOGVNGPOGPOGPOGPO  | 23.3 |
| GPOGPOGPOGMNGPOGPOGPOGPO  | 23   |
| GPOGPOGPOGINGPOGPOGPOGPO  | 22.8 |
| GPOGPOGPOGNNGPOGPOGPOGPO  | 22.7 |
| GPOGPOGPOGSNGPOGPOGPOGPO  | 22.4 |
| GPOGPOGPOGHNGPOGPOGPOGPO  | 20.9 |
| GPOGPOGPOGTNGPOGPOGPOGPO  | 20.6 |
| GPOGPOGPOGCNGPOGPOGPOGPO  | 20.5 |
| GPOGPOGPOGYNGPOGPOGPOGPO  | 18.7 |
| GPOGPOGPOGFNGPOGPOGPOGPO  | 17.9 |
| GPOGPOGPOGGNGPOGPOGPOGPO  | 17.6 |
| GPOGPOGPOGWNGPOGPOGPOGPO  | 16.3 |
| GPOGPOGPOGPYNGPOGPOGPOGPO | 30.2 |
| GPOGPOGPOGEYNGPOGPOGPOGPO | 25.8 |
| GPOGPOGPOGAYNGPOGPOGPOGPO | 24.6 |
| GPOGPOGPOGKYNGPOGPOGPOGPO | 24.4 |
| GPOGPOGPOGRYNGPOGPOGPOGPO | 23.5 |
| GPOGPOGPOGQYNGPOGPOGPOGPO | 23.3 |
| GPOGPOGPOGDYNGPOGPOGPOGPO | 23   |
| GPOGPOGPOGLYNGPOGPOGPOGPO | 21.9 |
| GPOGPOGPOGVYNGPOGPOGPOGPO | 21.8 |
| GPOGPOGPOGMYNGPOGPOGPOGPO | 21.5 |
| GPOGPOGPOGIYNGPOGPOGPOGPO | 21.3 |
| GPOGPOGPOGNYNGPOGPOGPOGPO | 21.2 |
| GPOGPOGPOGSYNGPOGPOGPOGPO | 20.9 |
| GPOGPOGPOGHYNGPOGPOGPOGPO | 19.4 |
| GPOGPOGPOGTYNGPOGPOGPOGPO | 19.1 |
| GPOGPOGPOGQYNGPOGPOGPOGPO | 19   |
| GPOGPOGPOGYNGPOGPOGPOGPO  | 17.2 |

|                                |      |
|--------------------------------|------|
| GPOGPOGPOGFYGPPOGPOGPOGPO      | 16.4 |
| GPOGPOGPOGGYGPPOGPOGPOGPO      | 16.1 |
| GPOGPOGPOGWYGPPOGPOGPOGPO      | 14.8 |
| GPOGPOGPOGPFYGPPOGPOGPOGPO     | 28.4 |
| GPOGPOGPOGEFGPPOGPOGPOGPO      | 24   |
| GPOGPOGPOGAFGPPOGPOGPOGPO      | 21.9 |
| GPOGPOGPOGKFGPPOGPOGPOGPO      | 22.6 |
| GPOGPOGPOGRFGPPOGPOGPOGPO      | 21.7 |
| GPOGPOGPOGQFGPPOGPOGPOGPO      | 21.5 |
| GPOGPOGPOGDFGPPOGPOGPOGPO      | 21.2 |
| GPOGPOGPOGLFGPPOGPOGPOGPO      | 20.1 |
| GPOGPOGPOGVFGPPOGPOGPOGPO      | 20   |
| GPOGPOGPOGMFGPPOGPOGPOGPO      | 19.7 |
| GPOGPOGPOGIFGPPOGPOGPOGPO      | 19.5 |
| GPOGPOGPOGNFGPPOGPOGPOGPO      | 19.4 |
| GPOGPOGPOGSFGPPOGPOGPOGPO      | 19.1 |
| GPOGPOGPOGHFGPPOGPOGPOGPO      | 17.6 |
| GPOGPOGPOGTFGPPOGPOGPOGPO      | 17.3 |
| GPOGPOGPOGCFGPPOGPOGPOGPO      | 17.2 |
| GPOGPOGPOGYFGPPOGPOGPOGPO      | 15.4 |
| GPOGPOGPOGFFGPPOGPOGPOGPO      | 14.6 |
| GPOGPOGPOGGFGPPOGPOGPOGPO      | 19.7 |
| GPOGPOGPOGWFGPPOGPOGPOGPO      | 13   |
| GPOGPOGPOGPWGPPOGPOGPOGPO      | 26.1 |
| GPOGPOGPOGEWGPPOGPOGPOGPO      | 21.7 |
| GPOGPOGPOGAWGPPOGPOGPOGPO      | 2.5  |
| GPOGPOGPOGKWGPPOGPOGPOGPO      | 20.3 |
| GPOGPOGPOGRWGPPOGPOGPOGPO      | 19.4 |
| GPOGPOGPOGQWGPPOGPOGPOGPO      | 19.2 |
| GPOGPOGPOGDWGPPOGPOGPOGPO      | 18.9 |
| GPOGPOGPOGLWGPPOGPOGPOGPO      | 17.8 |
| GPOGPOGPOGVWGPPOGPOGPOGPO      | 17.7 |
| GPOGPOGPOGMWGPPOGPOGPOGPO      | 17.4 |
| GPOGPOGPOGIWGPPOGPOGPOGPO      | 17.2 |
| GPOGPOGPOGNWGPPOGPOGPOGPO      | 17.1 |
| GPOGPOGPOGSWGPPOGPOGPOGPO      | 16.8 |
| GPOGPOGPOGHWGPPOGPOGPOGPO      | 15.3 |
| GPOGPOGPOGTWGPPOGPOGPOGPO      | 15   |
| GPOGPOGPOGCWGPPOGPOGPOGPO      | 14.9 |
| GPOGPOGPOGYWGPPOGPOGPOGPO      | 13.1 |
| GPOGPOGPOGFWGPPOGPOGPOGPO      | 12.3 |
| GPOGPOGPOGGWGPPOGPOGPOGPO      | 12   |
| GPOGPOGPOGWWGPPOGPOGPOGPO      | 10.7 |
| GPAGPAGPVSPAGARGPAGPOGPOGPOGPO | 16   |
| GPAGPAGPVGAPARGPAGPOGPOGPOGPO  | 27   |
| GPOGPOGPOGPOGPOGPOGPOGPO       | 62   |
| GPOGPOGPOGPOAOPGPOGPOGPOGPO    | 29   |
| GPOGPOGPOGPOGPOGPOGPOGPO       | 44.5 |
| GPOGPOGPOGPOGPOGPOGPOGPO       | 38.3 |

|                                                                                                                                                                                                                                                                                         |      |
|-----------------------------------------------------------------------------------------------------------------------------------------------------------------------------------------------------------------------------------------------------------------------------------------|------|
| GPOGPOGPOGPOGPOGPOGPO                                                                                                                                                                                                                                                                   | 34.8 |
| GPOGPOGPOSPOGPOGPOGPO                                                                                                                                                                                                                                                                   | 8.6  |
| GPOGPOGPOAPOGPOGPOGPO                                                                                                                                                                                                                                                                   | 9.9  |
| GPOGPOGPOCPOGPOGPOGPO                                                                                                                                                                                                                                                                   | -3   |
| GPOGPOGPOORPOGPOGPOGPO                                                                                                                                                                                                                                                                  | -7   |
| GPOGPOGPOVPOGPOGPOGPO                                                                                                                                                                                                                                                                   | -10  |
| GPOGPOGPOEPOGPOGPOGPO                                                                                                                                                                                                                                                                   | -16  |
| GPOGPOGPODPOGPOGPOGPO                                                                                                                                                                                                                                                                   | -17  |
| GQDGRNGERGEQGPTGPTGPAGPRGLQGLQ GLQGERGEQGPTGPAGPRGLQGERGEQGPT<br>GLAGKAGEAGAKGETGPAGPQGPRGEQGPQ GLP GARGERGFPERGVQGPP<br>GKDGEAGAQQPAGPMGPAGERGEKGEPTQQAAGDRGETGPVGPAGERGEAGPAGKD<br>GERGPVGPAGKDGQNGQDGLPGKDGKDGQN GKDGLPGKDGKDGQNGKDGLPGKDGKDGQD<br>GKDGLPGKDGKDGKGLPGKDGKDGQPGKPGKY  | 35.4 |
| GQDGRNGERGEQGPTGPTGPAGPRGLQGLQ GLQGERGEQGPTGPAGPRGLQGERGEQGPT<br>GLAGKAGEAGAKGETGPAGPQGPRGEQGPQ GLP GARGERAFPGERGVQGPP<br>GKDGEAGAQQPAGPMGPAGERGEKGEPTQQAAGDRGETGPVGPAGERGEAGPAGKD<br>GERGPVGPAGKDGQNGQDGLPGKDGKDGQN GKDGLPGKDGKDGQNGKDGLPGKDGKDGQD<br>GKDGLPGKDGKDGKGLPGKDGKDGQPGKPGKY | 33.9 |
| GQDGRNGERGEQGPTGPTGPAGPRGLQGLQ GLQGERGEQGPTGPAGPRGLQGERGEQGPT<br>GLAGKAGEAGAKGETGPAGPQGPRGEQGPQ GLP GARGERSFPGERGVQGPP<br>GKDGEAGAQQPAGPMGPAGERGEKGEPTQQAAGDRGETGPVGPAGERGEAGPAGKD<br>GERGPVGPAGKDGQNGQDGLPGKDGKDGQN GKDGLPGKDGKDGQNGKDGLPGKDGKDGQD<br>GKDGLPGKDGKDGKGLPGKDGKDGQPGKPGKY | 24.4 |
| GQDGRNGERGEQGPTGPTGPAGPRGLQGLQ GLQGERGEQGPTGPAGPRGLQGERGEQGPT<br>GLAGKAGEAGAKGETGPAGPQGPRGEQGPQ GLP GARGERVFPGERGVQGPP<br>GKDGEAGAQQPAGPMGPAGERGEKGEPTQQAAGDRGETGPVGPAGERGEAGPAGKD<br>GERGPVGPAGKDGQNGQDGLPGKDGKDGQN GKDGLPGKDGKDGQNGKDGLPGKDGKDGQD<br>GKDGLPGKDGKDGKGLPGKDGKDGQPGKPGKY | 24.4 |
| GQDGRNGERGEQGPTGPTGPAGPRGLQGLQ GLQGERGEQGPTGPAGPRGLQGERGEQGPT<br>GLAGKAGEAGAKGETGPAGPQGPRGEQGPQ GLP GARGERGFPAERGVQGPP<br>GKDGEAGAQQPAGPMGPAGERGEKGEPTQQAAGDRGETGPVGPAGERGEAGPAGKD<br>GERGPVGPAGKDGQNGQDGLPGKDGKDGQN GKDGLPGKDGKDGQNGKDGLPGKDGKDGQD<br>GKDGLPGKDGKDGKGLPGKDGKDGQPGKPGKY | 23.9 |
| GQDGRNGERGEQGPTGPTGPAGPRGLQGLQ GLQGERGEQGPTGPAGPRGLQGERGEQGPT<br>GLAGKAGEAGAKGETGPAGPQGPRGEQGPQ GLP GARGERGFPSERGVQGPP<br>GKDGEAGAQQPAGPMGPAGERGEKGEPTQQAAGDRGETGPVGPAGERGEAGPAGKD<br>GERGPVGPAGKDGQNGQDGLPGKDGKDGQN GKDGLPGKDGKDGQNGKDGLPGKDGKDGQD<br>GKDGLPGKDGKDGKGLPGKDGKDGQPGKPGKY | 23.9 |
| GQDGRNGERGEQGPTGPTGPAGPRGLQGLQ GLQGERGEQGPTGPAGPRGLQGERGEQGPT<br>GLAGKAGEAGAKGETGPAGPQGPRGEQGPQ GLP GARGERGFVVERGVQGPP<br>GKDGEAGAQQPAGPMGPAGERGEKGEPTQQAAGDRGETGPVGPAGERGEAGPAGKD<br>GERGPVGPAGKDGQNGQDGLPGKDGKDGQN GKDGLPGKDGKDGQNGKDGLPGKDGKDGQD<br>GKDGLPGKDGKDGKGLPGKDGKDGQPGKPGKY | 23.9 |
| GQDGRNGERGEQGPTGPTGPAGPRGLQGLQ GLQGERGEQGPTGPAGPRGLQGERGEQGPT<br>GLAGKAGEAGAKGETGPAGPQGPRGEQGPQ GLP GARGERGFPERAVQGPP<br>GKDGEAGAQQPAGPMGPAGERGEKGEPTQQAAGDRGETGPVGPAGERGEAGPAGKD<br>GERGPVGPAGKDGQNGQDGLPGKDGKDGQN GKDGLPGKDGKDGQNGKDGLPGKDGKDGQD<br>GKDGLPGKDGKDGKGLPGKDGKDGQPGKPGKY  | 23.4 |

|                                                                                                                                                                                                                                                                                      |       |
|--------------------------------------------------------------------------------------------------------------------------------------------------------------------------------------------------------------------------------------------------------------------------------------|-------|
| GQDGRNGERGEQGPTGPTGPAGPRGLQGLQ GLQGERGEQGPTGPAGPRGLQGERGEQGPT<br>GLAGKAGEAGAKGETGPAGPQQPRGEQGPQ GLP GARGERGFPGERSVQGP<br>GKDGEAGAQQPAGPMPAGERGEKEGEP GTQGAKGDRGETGPVGPGRGERGEAGPAGKD<br>GERGPVGPAGKDGQNGQDGLPGKDGKDGQN GKDGLPGKDGKDGQNGKDGLPGKDGKDGQD<br>GKDGLPGKDGKDGKDGKDGQPGKPGKY | 23.4  |
| GQDGRNGERGEQGPTGPTGPAGPRGLQGLQ GLQGERGEQGPTGPAGPRGLQGERGEQGPT<br>GLAGKAGEAGAKGETGPAGPQQPRGEQGPQ GLP GARGERGFGERVVQGP<br>GKDGEAGAQQPAGPMPAGERGEKEGEP GTQGAKGDRGETGPVGPGRGERGEAGPAGKD<br>GERGPVGPAGKDGQNGQDGLPGKDGKDGQN GKDGLPGKDGKDGQNGKDGLPGKDGKDGQD<br>GKDGLPGKDGKDGKDGKDGQPGKPGKY  | 23.4  |
| GQDGRNGERGEQGPTGPTGPAGPRGLQGLQ GLQGERGEQGPTGPAGPRGLQGERGEQGPT<br>GLAGKAGEAGAKGETGPAGPQQPRGEQGPQ GLP GARGERGFGERGVQAPP<br>GKDGEAGAQQPAGPMPAGERGEKEGEP GTQGAKGDRGETGPVGPGRGERGEAGPAGKD<br>GERGPVGPAGKDGQNGQDGLPGKDGKDGQN GKDGLPGKDGKDGQNGKDGLPGKDGKDGQD<br>GKDGLPGKDGKDGKDGKDGQPGKPGKY | 24.4  |
| GQDGRNGERGEQGPTGPTGPAGPRGLQGLQ GLQGERGEQGPTGPAGPRGLQGERGEQGPT<br>GLAGKAGEAGAKGETGPAGPQQPRGEQGPQ GLP GARGERGFGERGVQSPP<br>GKDGEAGAQQPAGPMPAGERGEKEGEP GTQGAKGDRGETGPVGPGRGERGEAGPAGKD<br>GERGPVGPAGKDGQNGQDGLPGKDGKDGQN GKDGLPGKDGKDGQNGKDGLPGKDGKDGQD<br>GKDGLPGKDGKDGKDGKDGQPGKPGKY | 23.9  |
| GQDGRNGERGEQGPTGPTGPAGPRGLQGLQ GLQGERGEQGPTGPAGPRGLQGERGEQGPT<br>GLAGKAGEAGAKGETGPAGPQQPRGEQGPQ GLP GARGERGFGERGVQVPP<br>GKDGEAGAQQPAGPMPAGERGEKEGEP GTQGAKGDRGETGPVGPGRGERGEAGPAGKD<br>GERGPVGPAGKDGQNGQDGLPGKDGKDGQN GKDGLPGKDGKDGQNGKDGLPGKDGKDGQD<br>GKDGLPGKDGKDGKDGKDGQPGKPGKY | 32.9  |
| GPOGPOGPOGPOAPOGPOGPOGPOGPO                                                                                                                                                                                                                                                          | 29.15 |
| GPOGPOGPOGPOAGPOGPOGPOGPOGPO                                                                                                                                                                                                                                                         | 18.55 |
| GPOGPOGPOGPGPOGPOGPOGPOGPO                                                                                                                                                                                                                                                           | 16.65 |
| GPOGPOGPOGPOGPQGGPPGPOGPOGPOGPO                                                                                                                                                                                                                                                      | 68    |
| GPOGPOGPOGPOGPQGGSPGPOGPOGPOGPO                                                                                                                                                                                                                                                      | 45    |
| GPOGPOGPOGPOGPVGAAGATGPOGPOGPOGPO                                                                                                                                                                                                                                                    | 54    |
| GPOGPOGPOGPOGPVGAASATGPOGPOGPOGPO                                                                                                                                                                                                                                                    | 33    |
| GDRGETGPAGPAGPVPAGARGPOGPOGPOGPO                                                                                                                                                                                                                                                     | 25    |
| GDRGETGPAGPAGPVAPAGARGPOGPOGPOGPO                                                                                                                                                                                                                                                    | 7     |
| GPOGAOGAOGAOGPVGPAGARGPOGPOGPOGPO                                                                                                                                                                                                                                                    | 35    |
| GPOGAOGAOGAOGPVAPAGARGPOGPOGPOGPO                                                                                                                                                                                                                                                    | 15    |
| GPAGPAGPVPAGARGPAGPOGPOGPOGPO                                                                                                                                                                                                                                                        | 20    |
| GPAGPAGPVPAGARGPAGPOGAOGAO                                                                                                                                                                                                                                                           | 14    |
| GPOGAKGEOGDAGAKGDAGPOGPOGPOGPOGPO                                                                                                                                                                                                                                                    | 31.5  |
| GPOGAKGEOGDAGAKADAGPOGPOGPOGPOGPO                                                                                                                                                                                                                                                    | 12    |
| GPOGPOGPOGPOGAKGDAGPOGPOGPOGPOGPO                                                                                                                                                                                                                                                    | 55    |
| GPOGPOGPOGPOGAKADAGPOGPOGPOGPOGPO                                                                                                                                                                                                                                                    | 30    |
| GPAGPAGPVPAGARGPAGPOGPOGPOGPO                                                                                                                                                                                                                                                        | 26.5  |
| GPAGPAGPVAPAGARGPAGPOGPOGPOGPO                                                                                                                                                                                                                                                       | 16    |
| GPAGPAGPVPAGARGPAGPOGPOAPOGPO                                                                                                                                                                                                                                                        | 6     |
| GLPGRGEQGPTGPTGPAGPRGLQGLQGLQGERGEQGPTGPAGPRGLPGERGEQGPTGLAGKAGEAGAKGETGPAG<br>PQGRGEQGPQGLPGKDGKDGKDGQNGKDGLPGKDGKDGQNGKDGLPGKDGKDGQDGLPGKDGKDGKDGQD<br>GPVGPAGKDGQNGQDGLPGKDGKDGQNGKDGLPGKDGKDGQNGKDGLPGKDGKDGQDGLPGKDGKDGKDGQD<br>DGKDGQPGKPGKY                                   | 38.5  |

|                                                                                                                                                                                                                                                               |      |
|---------------------------------------------------------------------------------------------------------------------------------------------------------------------------------------------------------------------------------------------------------------|------|
| GLPGPRGEQGPTGPTGPAGPRGLQGLQGLQGERGEQGPTGPAGPRGLPGERGEQGPTGLAGKAGEAGAKGETGPAG<br>PQGPRGEQGPQGLPGKDGEAGAQQPAGPMSPAGERGEKEGEPGTQGAKGDRGETGPVGPGRGERGEAGPAGKDGER<br>GPVGPAGKDGQNGQDGLPGKDGKDGQNGKDGPGKDGKDGQNGKDGKGLPGKDGKDGQDGDGLPGKDGKDGKGLPGK<br>DGKDGQPGKPGKY | 36.5 |
| GLPGPRGEQGPTGPTGPAGPRGLQGLQGLQGERGEQGPTGPAGPRGLPGERGEQGPTGLAGKAGEAGAKGETGPAG<br>PQGPRGEQGPQGLPGKDGEAGAQQPAGPMRPAERGEKEGEPGTQGAKGDRGETGPVGPGRGERGEAGPAGKDGER<br>GPVGPAGKDGQNGQDGLPGKDGKDGQNGKDGPGKDGKDGQNGKDGKGLPGKDGKDGQDGDGLPGKDGKDGKGLPGK<br>DGKDGQPGKPGKY  | 37   |
| GLPGPRGEQGPTGPMGPAGPRGLQGLQGLQGERGEQGPTGPAGPRGLPGERGEQGPTGLAGKAGEAGAKGETGPA<br>GPQGPRGEQGPQGLPGKDGEAGAQQPAGPMGPAGERGEKEGEPGTQGAKGDRGETGPVGPGRGERGEAGPAGKDGE<br>RGPVGPAGKDGQNGQDGLPGKDGKDGQNGKDGPGKDGKDGQNGKDGKGLPGKDGKDGQDGDGLPGKDGKDGKGLPG<br>KDGKDGQPGKPGKY | 38.3 |
| GLPGPRGEQGPTGPMRPAERGLQGLQGLQGERGEQGPTGPAGPRGLPGERGEQGPTGLAGKAGEAGAKGETGPA<br>GPQGPRGEQGPQGLPGKDGEAGAQQPAGPMGPAGERGEKEGEPGTQGAKGDRGETGPVGPGRGERGEAGPAGKDGE<br>RGPVGPAGKDGQNGQDGLPGKDGKDGQNGKDGPGKDGKDGQNGKDGKGLPGKDGKDGQDGDGLPGKDGKDGKGLPG<br>KDGKDGQPGKPGKY  | 6.7  |
